# Supplementary material
Source: MDPI journal article supplement (https://www.mdpi.com/2073-4352/11/5/529)
Supplement: s1 [file s1]

# Aromatic diamines as halogen bond acceptors

Erik Uran <sup>1</sup>, Luka Fotović <sup>1</sup>, Nikola Bedeković <sup>1</sup>, Vladimir Stilinović <sup>1\*</sup> and Dominik Cinčić <sup>1\*</sup>

<sup>1</sup> Department of Chemistry, Faculty of Science, University of Zagreb, Horvatovac 102a, HR-10002 Zagreb, Croatia; euran@chem.pmf.hr (E.U.), lfotovic@chem.pmf.hr (L.F.), nbedekovic@chem.pmf.hr (N.B.), vstilinovic@chem.pmf.hr (V.S.), dominik@chem.pmf.hr (D.C.)

\* Correspondence: vstilinovic@chem.pmf.hr (V.S.); Tel.: +385-1-4606-371 (V.S.)

## Table of Content

| Item                                                                                                    | Page |
|---------------------------------------------------------------------------------------------------------|------|
| <b>Figures S1–S5</b> (ORTEP representations of the formula units of the prepared compounds)             | 1    |
| <b>Figures S6–S10</b> (PXRD patterns of the prepared compounds)                                         | 3    |
| <b>Figures S11–S15</b> (DSC curves of the prepared compounds)                                           | 6    |
| <b>Table S1</b> Masses of reactants and volumes of solvents for successful crystallization experiments. | 8    |
| <b>Table S2</b> (Crystallographic data)                                                                 | 9    |
| Total electron energies and Cartesian coordinates for optimised structures                              | 10   |

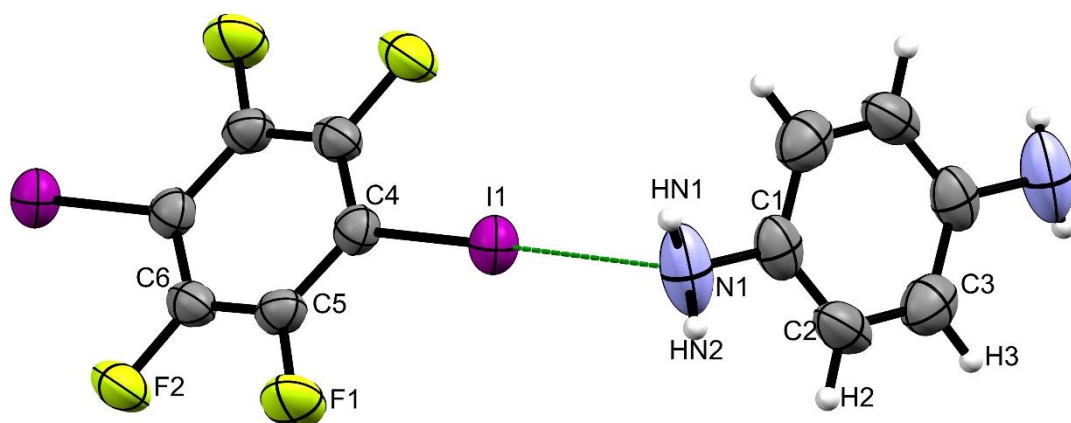

**Figure S1.** Molecular structure of (pphda)(14tfib) showing the atom-labelling scheme. Displacement ellipsoids are drawn at the 50 % probability level, and H atoms are shown as small spheres of arbitrary radius.

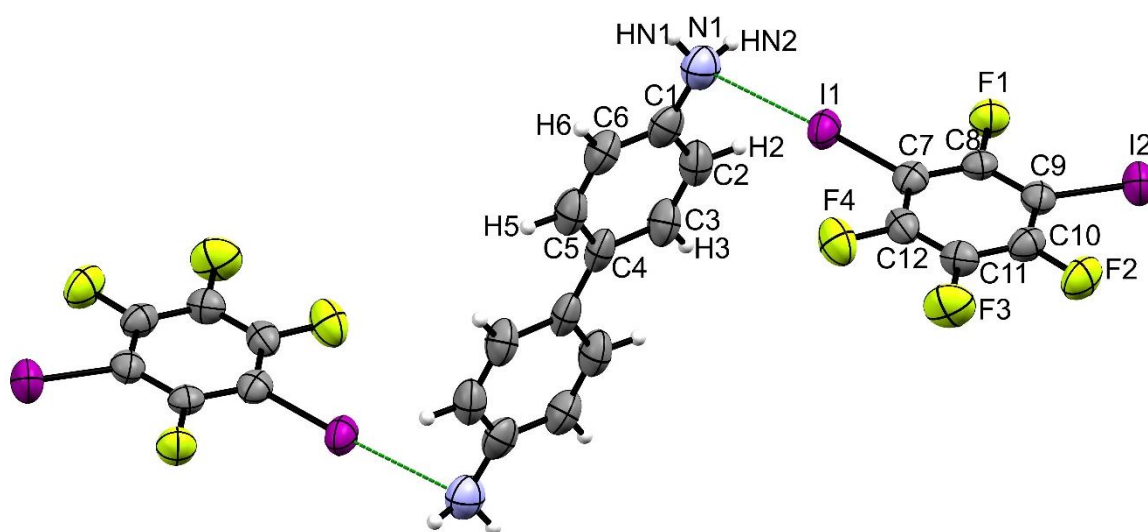

**Figure S2.** Molecular structure of (bnzd)(13tfib)<sub>2</sub> showing the atom-labelling scheme. Displacement ellipsoids are drawn at the 50 % probability level, and H atoms are shown as small spheres of arbitrary radius.

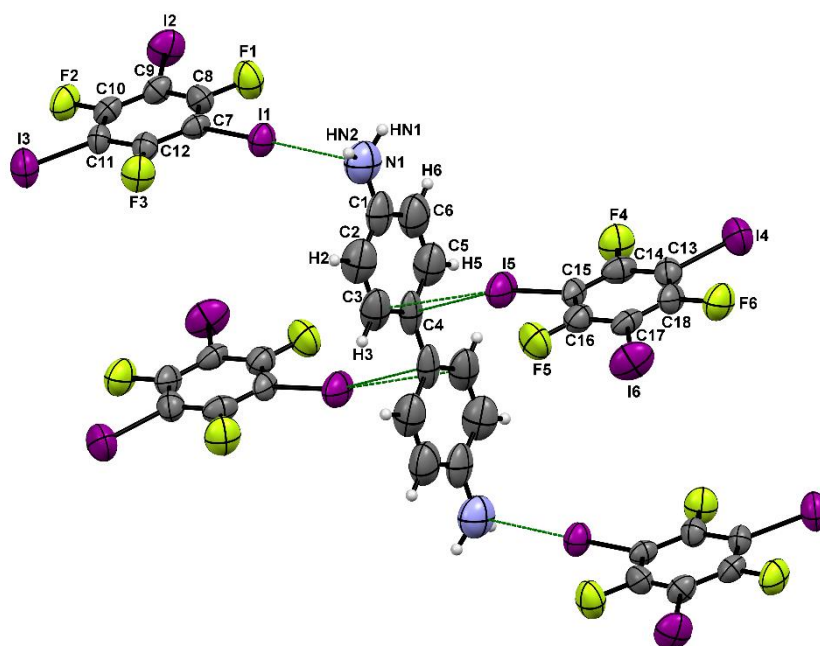

**Figure S3.** Molecular structure of **(bnzd)(135tfib)<sub>4</sub>** showing the atom-labelling scheme. Displacement ellipsoids are drawn at the 50 % probability level, and H atoms are shown as small spheres of arbitrary radius.

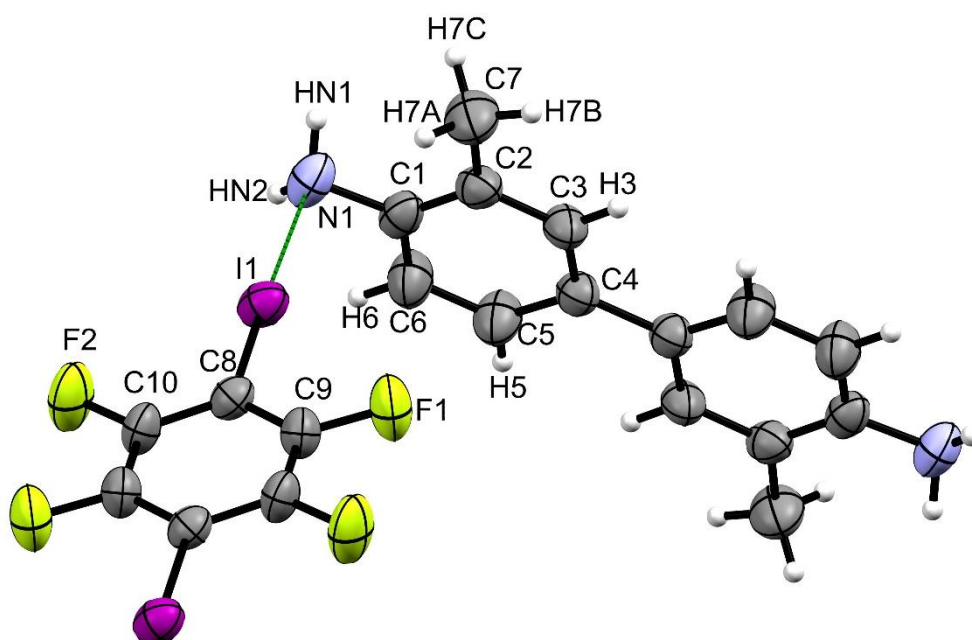

**Figure S4.** Molecular structure of **(otol)(14tfib)** showing the atom-labelling scheme. Displacement ellipsoids are drawn at the 50 % probability level, and H atoms are shown as small spheres of arbitrary radius.

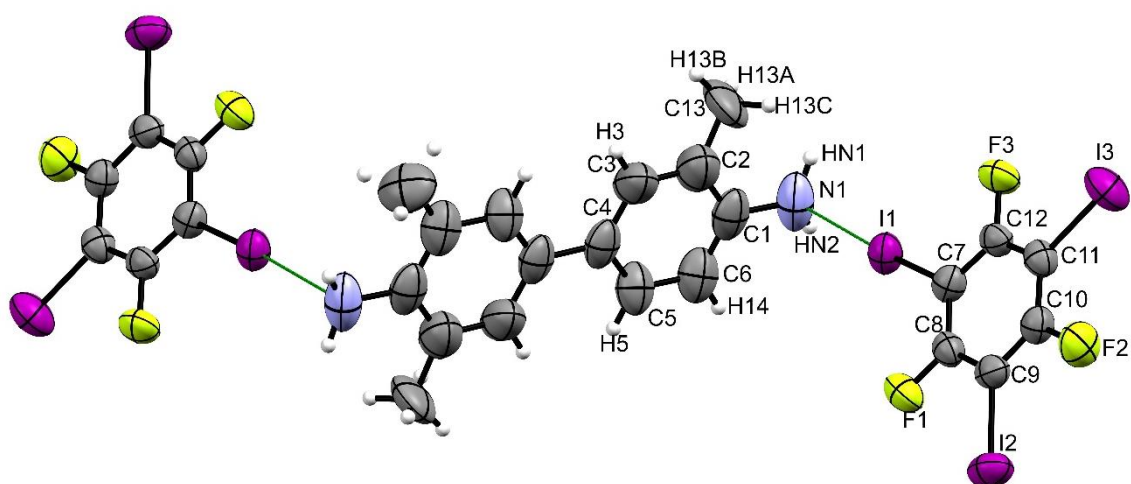

**Figure S5.** Molecular structure of **(otol)(135tfib)<sub>2</sub>** showing the atom-labelling scheme. Displacement ellipsoids are drawn at the 50 % probability level, and H atoms are shown as small spheres of arbitrary radius.

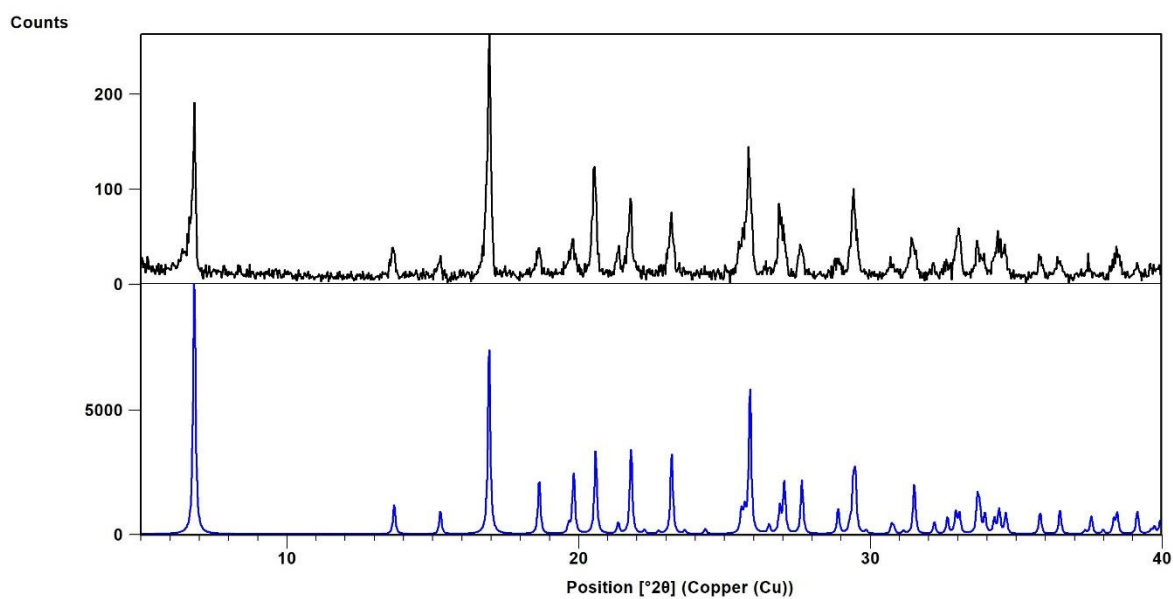

**Figure S6.** Measured (black) and calculated (blue) PXRD patterns of **(pphda)(14tfib)**.

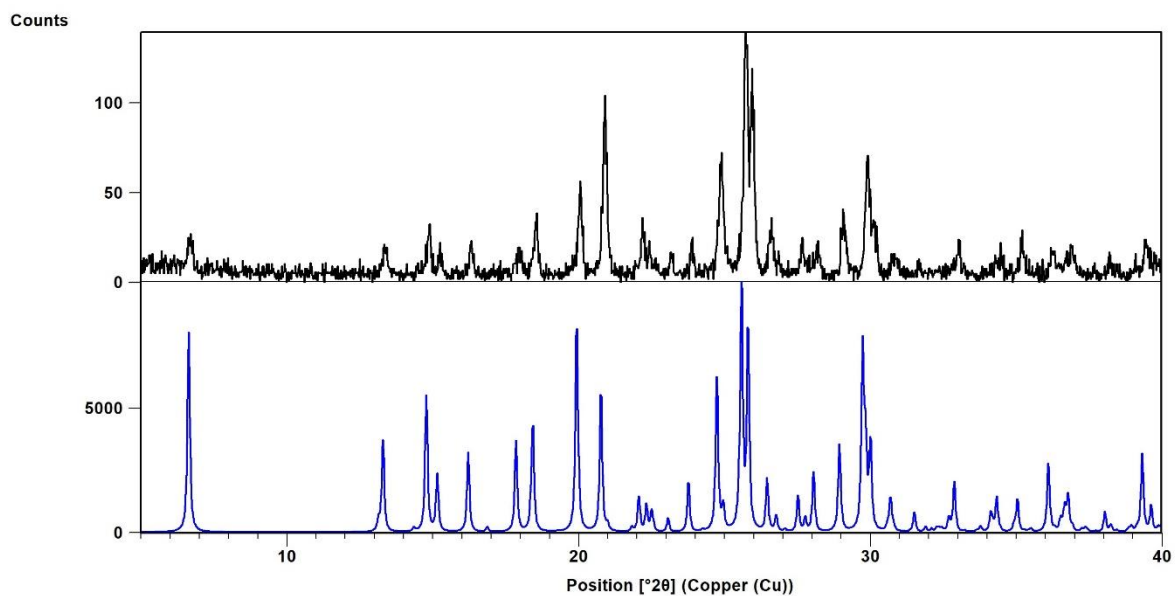

Figure S7. Measured (black) and calculated (blue) PXRD patterns of **(bnzd)(13tfib)<sub>2</sub>**.

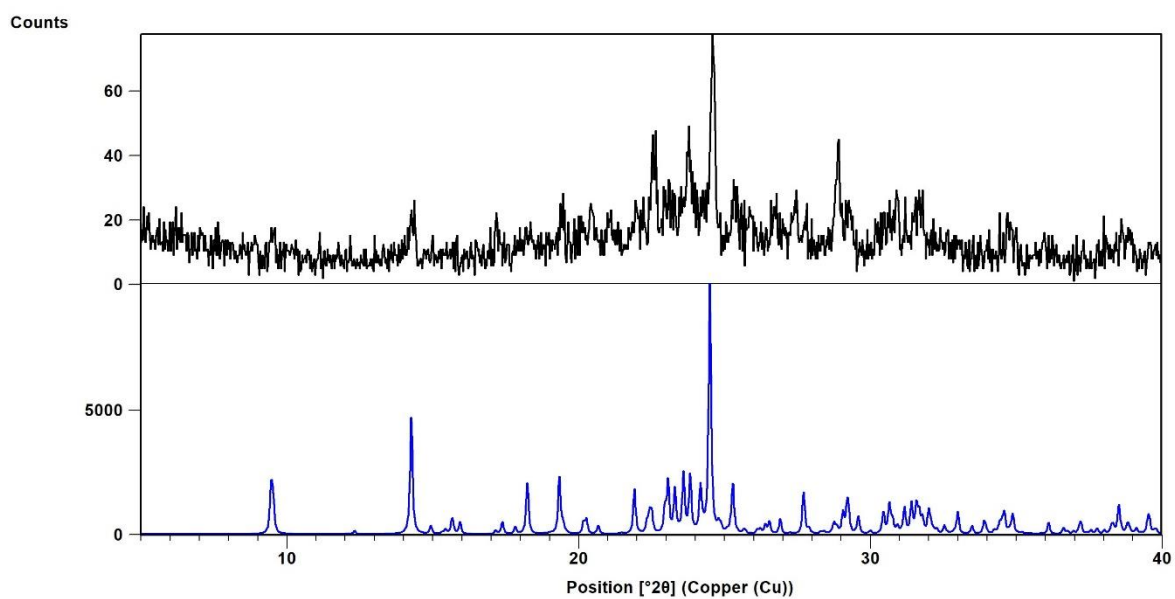

Figure S8. Measured (black) and calculated (blue) PXRD patterns of **(bnzd)(135tfib)<sub>4</sub>**.

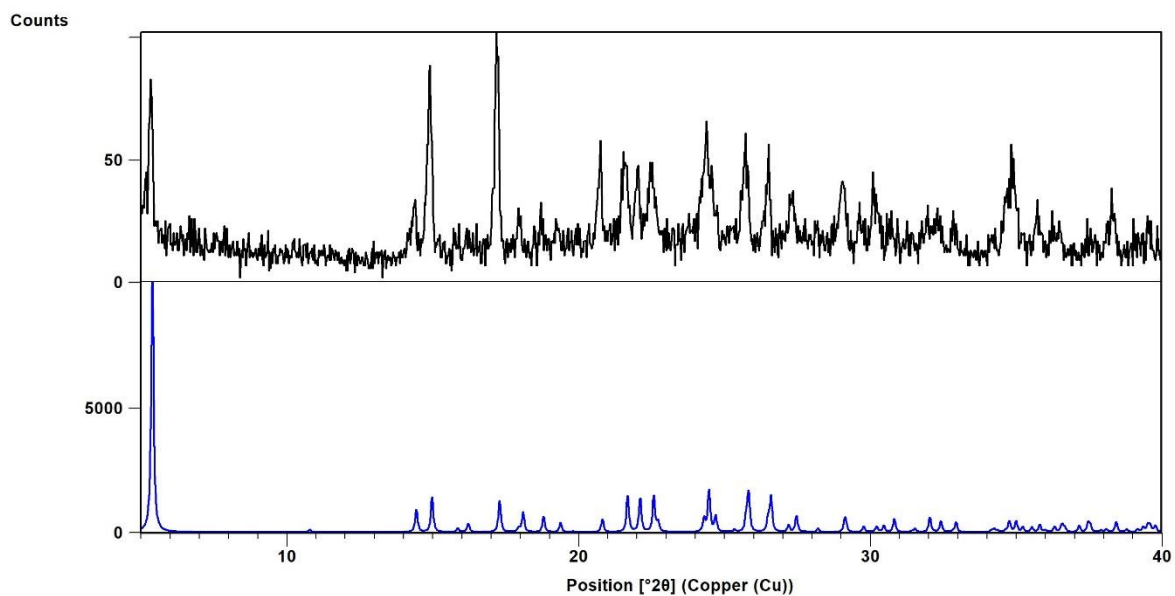

**Figure S9.** Measured (black) and calculated (blue) PXRd patterns of (otol)(14tfib).

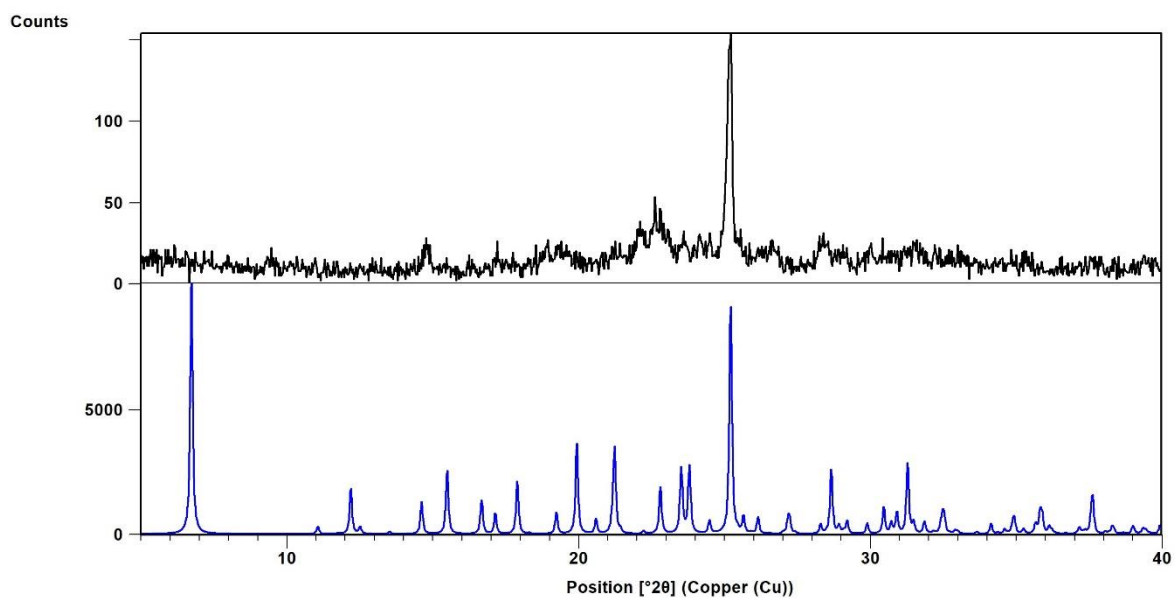

**Figure S10.** Measured (black) and calculated (blue) PXRd patterns of (otol)(135tfib)<sub>2</sub>.

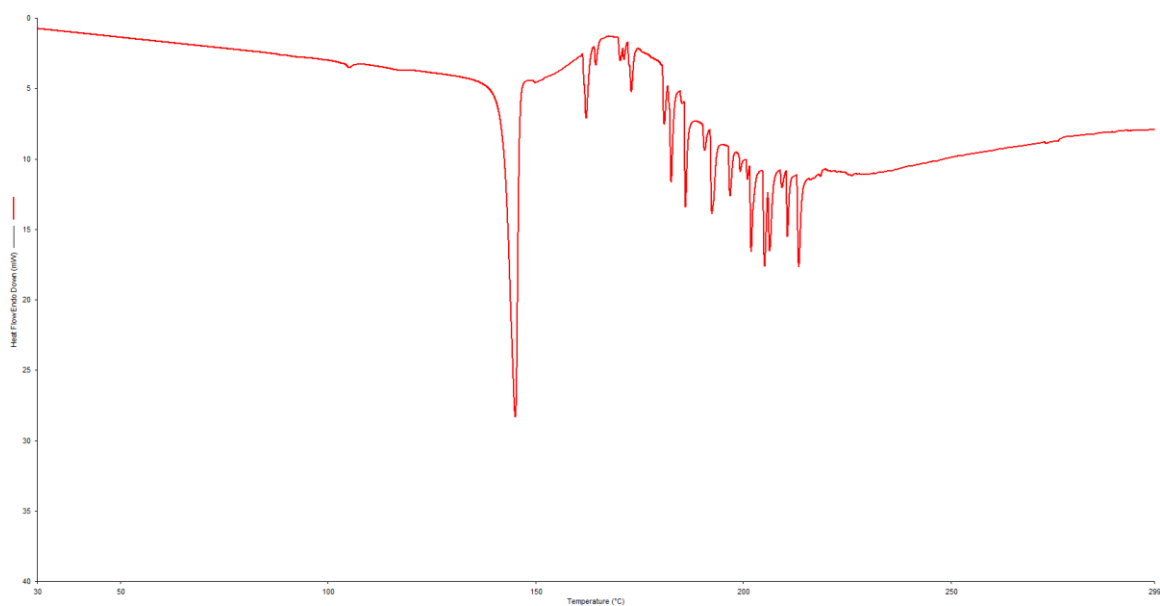

Figure S11. DSC thermogram of product of solution synthesis of (pphda)(14tfib).

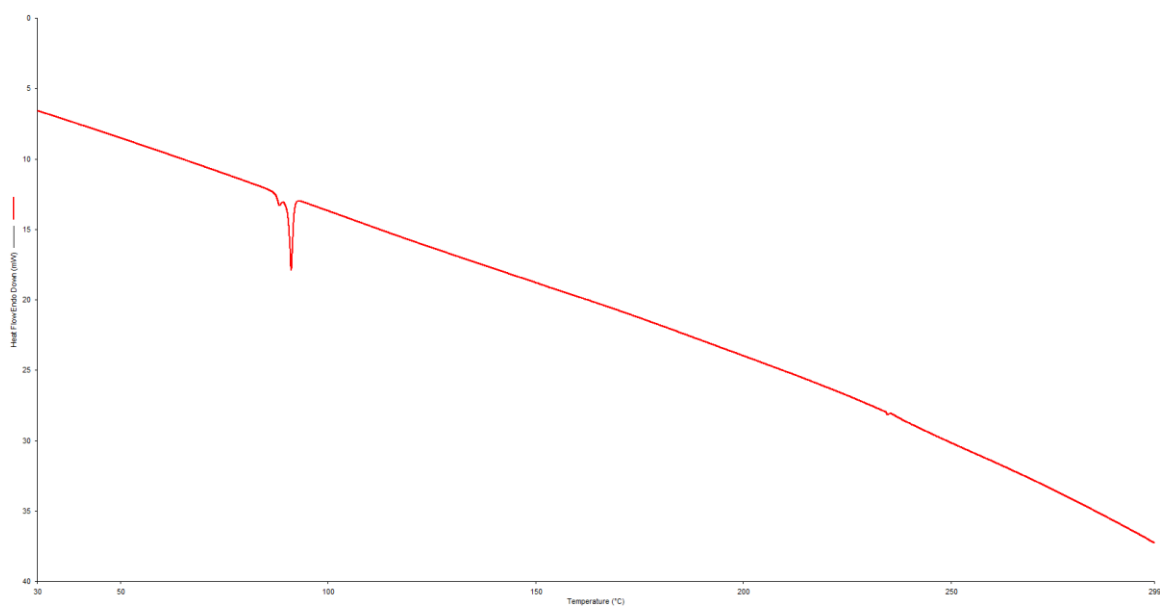

Figure S12. DSC thermogram of product of solution synthesis of (bnzd)(13tfib)<sub>2</sub>.

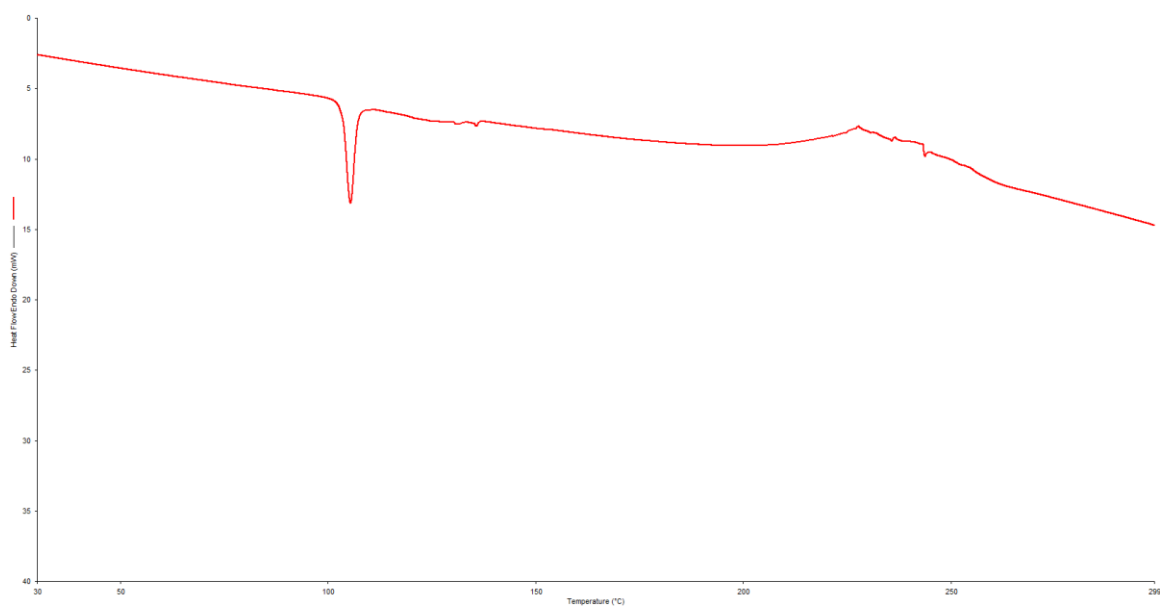

Figure S13. DSC thermogram of product of solution synthesis of **(bnzd)(135tfib)<sub>4</sub>**.

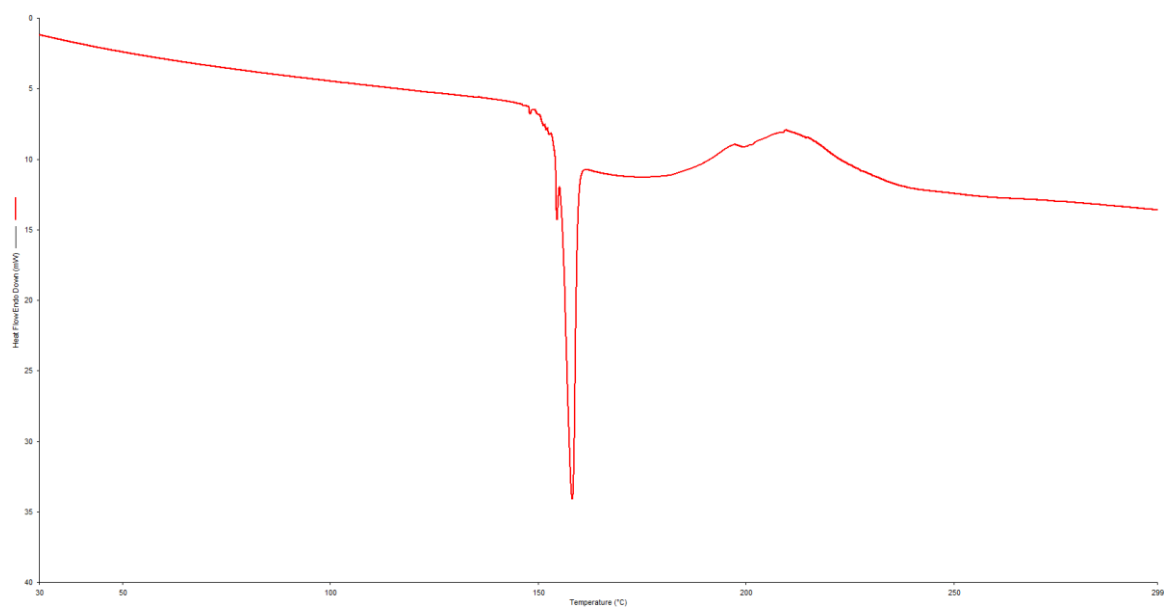

Figure S14. DSC thermogram of product of solution synthesis of **(otol)(14tfib)**.



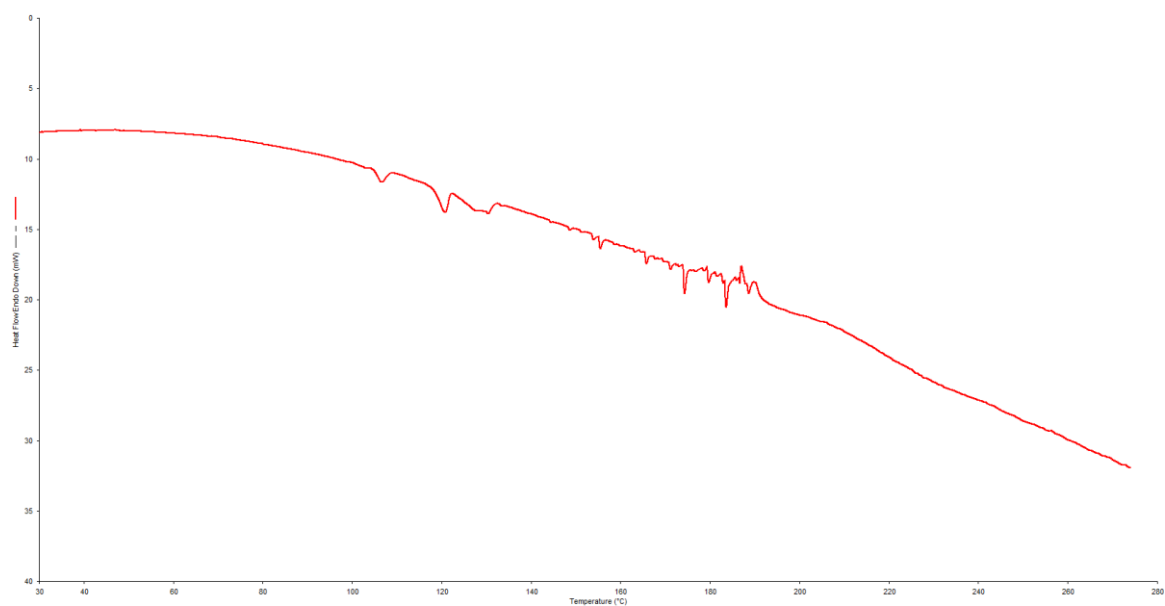

**Figure S15.** DSC thermogram of (otol)(135tfib)<sub>2</sub>.

**Table S1.** Masses of reactants and volumes of solvents for successful crystallization experiments.

| Reactants    |                | Molar ratio<br>A : D | <i>m</i> (A) / mg | <i>m</i> (D) /<br>mg | Solvent (L)             | <i>V</i> (L) /<br>mL |
|--------------|----------------|----------------------|-------------------|----------------------|-------------------------|----------------------|
| A            | D              |                      |                   |                      |                         |                      |
| <b>otol</b>  | <b>14tfib</b>  | 1 : 1                | 10                | 20                   | EtOH                    | 2                    |
| <b>otol</b>  | <b>135tfib</b> | 1 : 2                | 10                | 40                   | EtOH                    | 10                   |
| <b>bnzd</b>  | <b>13tfib</b>  | 1 : 2                | 10                | 40                   | EtOH                    | 3                    |
| <b>bnzd</b>  | <b>135tfib</b> | 1 : 2                | 10                | 50                   | EtOH                    | 3                    |
| <b>pphda</b> | <b>14tfib</b>  | 1 : 1                | 10                | 35                   | EtOH/Me <sub>2</sub> CO | 3                    |

**Table S2.** An overview and crystallographic data of the prepared compounds.

|                                                                        | (pphda)(14tfib)                                                             | (bnzd)(13tfib) <sub>2</sub>                                                  | (bnzd)(135tfib) <sub>4</sub>                                                   | (otol)(14tfib)                                                               | (otol)(135tfib) <sub>2</sub>                                                 |
|------------------------------------------------------------------------|-----------------------------------------------------------------------------|------------------------------------------------------------------------------|--------------------------------------------------------------------------------|------------------------------------------------------------------------------|------------------------------------------------------------------------------|
| Molecular formula                                                      | C <sub>12</sub> H <sub>8</sub> F <sub>4</sub> I <sub>2</sub> N <sub>2</sub> | C <sub>24</sub> H <sub>12</sub> F <sub>8</sub> I <sub>4</sub> N <sub>2</sub> | C <sub>30</sub> H <sub>20</sub> F <sub>12</sub> I <sub>12</sub> N <sub>2</sub> | C <sub>20</sub> H <sub>20</sub> F <sub>4</sub> I <sub>2</sub> N <sub>2</sub> | C <sub>26</sub> H <sub>16</sub> F <sub>6</sub> I <sub>6</sub> N <sub>2</sub> |
| $M_r$                                                                  | 510.00                                                                      | 987.96                                                                       | 2159.28                                                                        | 618.18                                                                       | 1231.81                                                                      |
| Crystal system                                                         | triclinic                                                                   | orthorhombic                                                                 | triclinic                                                                      | triclinic                                                                    | monoclinic                                                                   |
| Space group                                                            | $P-1$                                                                       | $P bca$                                                                      | $P-1$                                                                          | $P-1$                                                                        | $P 2_1/c$                                                                    |
| Crystal data:                                                          |                                                                             |                                                                              |                                                                                |                                                                              |                                                                              |
| $a / \text{\AA}$                                                       | 4.6046(3)                                                                   | 8.5466(5)                                                                    | 9.4338(12)                                                                     | 5.0079(3)                                                                    | 7.5646(3)                                                                    |
| $b / \text{\AA}$                                                       | 6.1794(5)                                                                   | 11.9758(7)                                                                   | 11.7698(15)                                                                    | 6.1910(3)                                                                    | 26.2421(13)                                                                  |
| $c / \text{\AA}$                                                       | 13.2376(11)                                                                 | 26.6168(9)                                                                   | 11.9237(11)                                                                    | 16.5464(8)                                                                   | 8.4074(4)                                                                    |
| $\alpha / ^\circ$                                                      | 81.193(7)                                                                   | 90                                                                           | 75.793(9)                                                                      | 94.147(4)                                                                    | 90                                                                           |
| $\beta / ^\circ$                                                       | 80.366(6)                                                                   | 90                                                                           | 86.652(9)                                                                      | 96.507(5)                                                                    | 94.025(4)                                                                    |
| $\gamma / ^\circ$                                                      | 82.247(6)                                                                   | 90                                                                           | 82.035(8)                                                                      | 96.482(5)                                                                    | 90                                                                           |
| $V / \text{\AA}^3$                                                     | 364.65(5)                                                                   | 2722.3(2)                                                                    | 1270.7(3)                                                                      | 504.55(5)                                                                    | 1664.84(13)                                                                  |
| $Z$                                                                    | 1                                                                           | 4                                                                            | 1                                                                              | 1                                                                            | 2                                                                            |
| $D_{\text{calc}} / \text{g cm}^{-3}$                                   | 2.322                                                                       | 2.409                                                                        | 2.905                                                                          | 2.021                                                                        | 2.457                                                                        |
| $\lambda(\text{MoK}\alpha) / \text{\AA}$                               | 0.71073                                                                     | 0.71073                                                                      | 0.71073                                                                        | 0.71073                                                                      | 0.71073                                                                      |
| $T / \text{K}$                                                         | 295                                                                         | 295                                                                          | 295                                                                            | 295                                                                          | 295                                                                          |
| Crystal size / mm <sup>3</sup>                                         | 0.28 x 0.24 x 0.16                                                          | 0.26 x 0.15 x 0.08                                                           | 0.30 x 0.12 x 0.10                                                             | 0.22 x 0.22 x 0.18                                                           | 0.18 x 0.18 x 0.14                                                           |
| $\mu / \text{mm}^{-1}$                                                 | 4.346                                                                       | 4.648                                                                        | 7.385                                                                          | 3.160                                                                        | 5.651                                                                        |
| $F(000)$                                                               | 236                                                                         | 1816                                                                         | 986                                                                            | 292                                                                          | 1116                                                                         |
| Refl. collected/unique                                                 | 3031 / 1576                                                                 | 16542 / 2657                                                                 | 7917 / 4425                                                                    | 4809 / 2188                                                                  | 10315 / 3620                                                                 |
| Data/restraints / parameters                                           | 99                                                                          | 179                                                                          | 286                                                                            | 134                                                                          | 200                                                                          |
| $\Delta\rho_{\text{max}}, \Delta\rho_{\text{min}} / \text{e \AA}^{-3}$ | 0.391; -1.074                                                               | 0.565; -0.747                                                                | 2.168; -1.542                                                                  | 0.501; -0.705                                                                | 0.710; -0.968                                                                |
| $R[F^2 > 4\sigma(F^2)]$                                                | 0.0284                                                                      | 0.0372                                                                       | 0.0597                                                                         | 0.0278                                                                       | 0.0413                                                                       |
| $wR(F^2)$                                                              | 0.0661                                                                      | 0.0846                                                                       | 0.1710                                                                         | 0.0724                                                                       | 0.1050                                                                       |
| Goodness-of-fit, $S$                                                   | 1.083                                                                       | 1.095                                                                        | 1.025                                                                          | 1.035                                                                        | 1.043                                                                        |

Total electron energies and Cartesian coordinates for optimised structures:

### Aniline

$E = -287.78568793$  a.u.

|    |   |   |           |           |           |
|----|---|---|-----------|-----------|-----------|
| 1  | C | 0 | 0.935599  | 0.000005  | -0.007480 |
| 2  | C | 0 | 0.219775  | 1.203289  | -0.004196 |
| 3  | C | 0 | -1.167913 | 1.197851  | 0.003296  |
| 4  | C | 0 | -1.875425 | 0.000000  | 0.006870  |
| 5  | C | 0 | -1.167905 | -1.197856 | 0.003292  |
| 6  | C | 0 | 0.219776  | -1.203289 | -0.004195 |
| 7  | H | 0 | 0.758374  | 2.144371  | -0.011304 |
| 8  | H | 0 | -1.700290 | 2.141251  | 0.007302  |
| 9  | H | 0 | -2.957291 | -0.000010 | 0.013265  |
| 10 | H | 0 | -1.700289 | -2.141252 | 0.007294  |
| 11 | H | 0 | 0.758387  | -2.144364 | -0.011292 |
| 12 | N | 0 | 2.328248  | 0.000000  | -0.073409 |
| 13 | H | 0 | 2.779966  | 0.836168  | 0.261529  |
| 14 | H | 0 | 2.779961  | -0.836167 | 0.261542  |

### Methylamine

$E = -95.90249789$  a.u.

|   |   |   |           |           |           |
|---|---|---|-----------|-----------|-----------|
| 1 | N | 0 | -0.749282 | -0.000001 | -0.120150 |
| 2 | H | 0 | -1.153826 | -0.813506 | 0.327764  |
| 3 | H | 0 | -1.153822 | 0.813506  | 0.327765  |
| 4 | C | 0 | 0.706511  | -0.000001 | 0.017425  |
| 5 | H | 0 | 1.116606  | -0.878107 | -0.485304 |
| 6 | H | 0 | 1.116590  | 0.878184  | -0.485179 |
| 7 | H | 0 | 1.080360  | -0.000070 | 1.051459  |

### Iodopentafluorobenzene

$E = -1025.91139651$  a.u.

|    |   |   |           |           |           |
|----|---|---|-----------|-----------|-----------|
| 1  | C | 0 | 0.209838  | -0.000111 | -0.000074 |
| 2  | C | 0 | -0.503142 | 1.194287  | -0.000110 |
| 3  | C | 0 | -1.891350 | 1.201319  | 0.000048  |
| 4  | C | 0 | -2.587057 | -0.000091 | 0.000134  |
| 5  | C | 0 | -1.891563 | -1.201511 | 0.000027  |
| 6  | C | 0 | -0.503205 | -1.194260 | -0.000146 |
| 7  | F | 0 | 0.129251  | 2.368821  | -0.000256 |
| 8  | F | 0 | -2.559275 | 2.354530  | 0.000047  |
| 9  | F | 0 | -3.917117 | 0.000390  | 0.000074  |
| 10 | F | 0 | -2.559186 | -2.354740 | 0.000079  |
| 11 | F | 0 | 0.129154  | -2.368926 | -0.000268 |
| 12 | I | 0 | 2.301763  | 0.000029  | 0.000069  |

### Aniline dimer

$E = -575.46220950$  a.u.

|    |   |   |           |           |           |
|----|---|---|-----------|-----------|-----------|
| 1  | N | 0 | 1.047720  | 2.003497  | 0.205657  |
| 2  | C | 0 | 1.819415  | 0.858136  | 0.033235  |
| 3  | C | 0 | 3.212068  | 0.907220  | 0.182737  |
| 4  | C | 0 | 3.978702  | -0.243629 | 0.064498  |
| 5  | C | 0 | 3.381502  | -1.471361 | -0.202532 |
| 6  | C | 0 | 1.998591  | -1.524972 | -0.350323 |
| 7  | C | 0 | 1.222004  | -0.380967 | -0.236147 |
| 8  | H | 0 | 1.536113  | 2.874535  | 0.072773  |
| 9  | H | 0 | 0.128993  | 2.008278  | -0.217181 |
| 10 | H | 0 | 3.691254  | 1.856522  | 0.396362  |
| 11 | H | 0 | 5.053743  | -0.177913 | 0.182068  |
| 12 | H | 0 | 3.981362  | -2.367235 | -0.294495 |
| 13 | H | 0 | 1.511881  | -2.470285 | -0.558453 |
| 14 | H | 0 | 0.148020  | -0.445366 | -0.347800 |
| 15 | N | 0 | -2.117948 | 2.188747  | -0.425500 |
| 16 | C | 0 | -2.297486 | 0.827506  | -0.134999 |
| 17 | C | 0 | -2.555684 | -0.089371 | -1.157454 |
| 18 | C | 0 | -2.628373 | -1.447803 | -0.879026 |
| 19 | C | 0 | -2.446675 | -1.916428 | 0.417654  |
| 20 | C | 0 | -2.192463 | -1.004078 | 1.436376  |
| 21 | C | 0 | -2.117617 | 0.355084  | 1.167855  |
| 22 | H | 0 | -2.566670 | 2.502905  | -1.272844 |
| 23 | H | 0 | -2.311102 | 2.811784  | 0.344687  |
| 24 | H | 0 | -2.682223 | 0.263547  | -2.174608 |
| 25 | H | 0 | -2.823186 | -2.143906 | -1.685263 |
| 26 | H | 0 | -2.497063 | -2.975895 | 0.630025  |
| 27 | H | 0 | -2.037915 | -1.352485 | 2.449656  |
| 28 | H | 0 | -1.885516 | 1.053779  | 1.962718  |

**Aniline\_iodopentafluorobenzene** $E = -1313.64758258$  a.u.

|    |   |   |           |           |           |
|----|---|---|-----------|-----------|-----------|
| 1  | I | 0 | -0.497474 | -0.619114 | -0.580661 |
| 2  | F | 0 | 2.048077  | -2.373829 | 0.383395  |
| 3  | F | 0 | 1.147372  | 2.157433  | -0.670610 |
| 4  | C | 0 | 1.514481  | -0.128781 | -0.161208 |
| 5  | C | 0 | 1.970397  | 1.179127  | -0.280061 |
| 6  | C | 0 | 2.422896  | -1.097387 | 0.249313  |
| 7  | F | 0 | 3.703613  | 2.779290  | -0.119772 |
| 8  | F | 0 | 4.598875  | -1.725289 | 0.928464  |
| 9  | C | 0 | 4.177129  | 0.533531  | 0.409949  |
| 10 | C | 0 | 3.743689  | -0.778980 | 0.534709  |
| 11 | C | 0 | 3.287335  | 1.516852  | 0.000615  |
| 12 | C | 0 | -5.136237 | 1.778769  | 0.192053  |
| 13 | H | 0 | -5.389350 | 2.778474  | -0.138002 |
| 14 | C | 0 | -4.471511 | -0.785931 | 1.017986  |
| 15 | H | 0 | -4.202814 | -1.783436 | 1.346302  |
| 16 | C | 0 | -5.487813 | 1.356819  | 1.469786  |
| 17 | N | 0 | -3.378658 | -1.204678 | -1.114890 |
| 18 | H | 0 | -3.492401 | -1.010087 | -2.099282 |
| 19 | H | 0 | -3.491259 | -2.190859 | -0.928955 |
| 20 | C | 0 | -4.458037 | 0.929541  | -0.671509 |
| 21 | H | 0 | -4.177573 | 1.271239  | -1.661184 |
| 22 | C | 0 | -4.123569 | -0.363890 | -0.266385 |
| 23 | H | 0 | -6.016140 | 2.021391  | 2.140257  |
| 24 | C | 0 | -5.149582 | 0.070175  | 1.875045  |
| 25 | H | 0 | -5.413859 | -0.273154 | 2.867382  |
| 26 | F | 0 | 5.442624  | 0.848302  | 0.681963  |

### Methylamine dimer

$E = -191.81295444$  a.u.

|    |   |   |           |           |           |
|----|---|---|-----------|-----------|-----------|
| 1  | N | 0 | 1.405064  | -0.612568 | -0.427370 |
| 2  | H | 0 | 1.982661  | -1.444117 | -0.396004 |
| 3  | H | 0 | 0.517481  | -0.837375 | 0.017212  |
| 4  | N | 0 | -1.659380 | -0.621527 | 0.334857  |
| 5  | H | 0 | -2.218699 | -0.675898 | 1.177404  |
| 6  | H | 0 | -2.019829 | -1.317211 | -0.307565 |
| 7  | C | 0 | -1.728531 | 0.717291  | -0.259777 |
| 8  | H | 0 | -1.355969 | 1.446985  | 0.460905  |
| 9  | H | 0 | -1.069223 | 0.751787  | -1.127880 |
| 10 | H | 0 | -2.733298 | 1.030072  | -0.571390 |
| 11 | C | 0 | 2.058180  | 0.492085  | 0.271553  |
| 12 | H | 0 | 3.000944  | 0.737816  | -0.222630 |
| 13 | H | 0 | 1.423845  | 1.379264  | 0.211933  |
| 14 | H | 0 | 2.274403  | 0.311091  | 1.334953  |

### Methylamine\_iodopentafluorobenzene

$E = -1121.82761655$  a.u.

|    |   |   |           |           |           |
|----|---|---|-----------|-----------|-----------|
| 1  | I | 0 | -1.666467 | -0.146556 | -0.131432 |
| 2  | F | 0 | 0.661680  | -2.394498 | 0.034305  |
| 3  | F | 0 | 0.425028  | 2.336359  | -0.104682 |
| 4  | C | 0 | 0.453909  | -0.033698 | -0.038484 |
| 5  | C | 0 | 1.112589  | 1.189651  | -0.044090 |
| 6  | C | 0 | 1.231564  | -1.183436 | 0.025872  |
| 7  | F | 0 | 3.108095  | 2.459843  | 0.005089  |
| 8  | F | 0 | 3.343395  | -2.243536 | 0.143837  |
| 9  | C | 0 | 3.252487  | 0.109592  | 0.075736  |
| 10 | C | 0 | 2.617311  | -1.124311 | 0.082878  |
| 11 | C | 0 | 2.497258  | 1.272154  | 0.012070  |
| 12 | N | 0 | -4.517990 | -0.285436 | -0.228251 |

|    |   |   |           |           |           |
|----|---|---|-----------|-----------|-----------|
| 13 | H | 0 | -4.804661 | -0.093458 | -1.180734 |
| 14 | H | 0 | -4.781914 | -1.240855 | -0.018907 |
| 15 | F | 0 | 4.582425  | 0.177906  | 0.129570  |
| 16 | C | 0 | -5.125490 | 0.658554  | 0.715505  |
| 17 | H | 0 | -4.769327 | 0.434813  | 1.721309  |
| 18 | H | 0 | -4.797708 | 1.668693  | 0.469257  |
| 19 | H | 0 | -6.221063 | 0.640620  | 0.722749  |
